# Supplementary material for: Cracks bring robustness: a pre-cracked NiO nanosponge electrode with greatly enhanced cycle stability and rate performance
Source: Royal Society of Chemistry journal article supplement (doi:10.1039/c6ta02568d), 2016-01-01
Supplement: c6ta02568d1.pdf [file c6ta02568d1.pdf]

## Electronic Supplementary Information

### Cracks Bring Robustness: Pre-cracked NiO Nanosponge Electrode with Greatly Enhanced Cycle stability and Rate Performance

Guoge Zhang\*, Lan Wang, Yan Liu, Wenfang Li, Fei Yu, Wei Lu and Haitao Huang\*

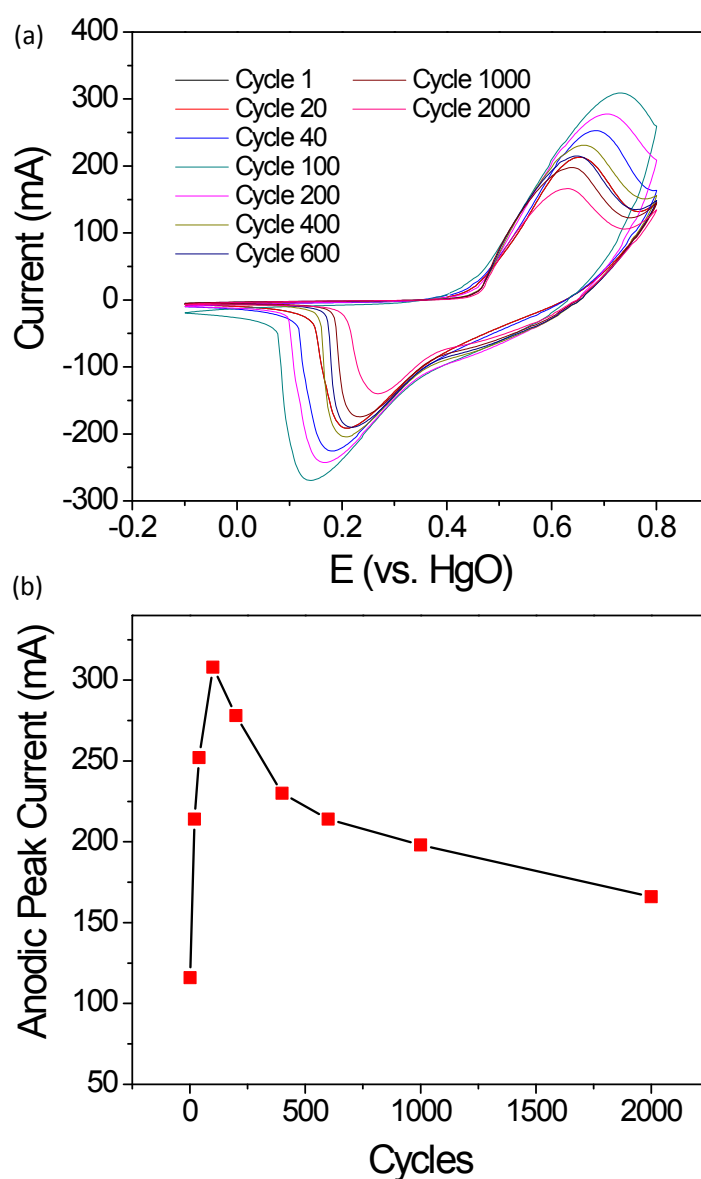

**Figure S1.** (a) CV (cyclic voltammetry) curves of PNC (porous nickel composite) at 100 mV s<sup>-1</sup>. (b) The variation of anodic peak current with the cycle number.

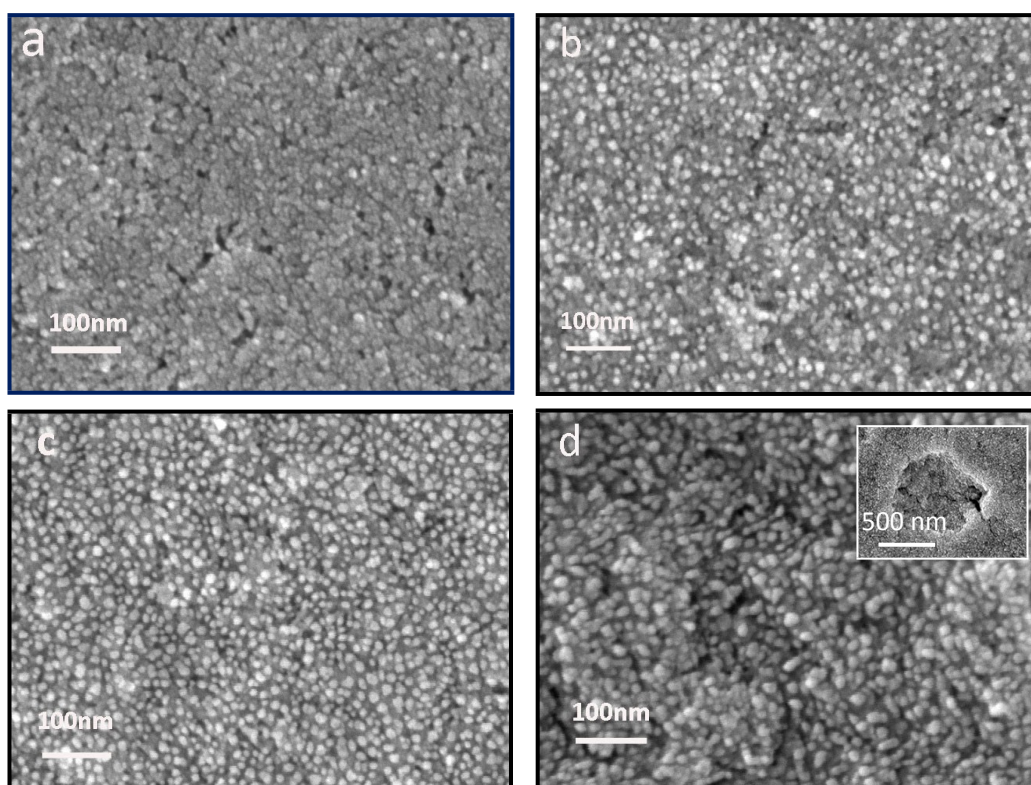

**Figure S2.** FESEM images of PNC after different cycles of CV test, (a) cycle 0; (b) cycle 20; (c) cycle 40; (d) cycle 600.

**Table S1.** Element content for PNC after different CV cycles

| Element | Content (wt.%) |          |          |           |
|---------|----------------|----------|----------|-----------|
|         | Cycle 0        | Cycle 20 | Cycle 40 | Cycle 600 |
| O       | 11.28          | 18.52    | 22.72    | 27.44     |
| F       | 23.19          | 9.86     | 4.61     | 0         |
| P       | 2.22           | 2.19     | 0        | 0         |
| Ni      | 63.32          | 69.43    | 72.68    | 72.56     |

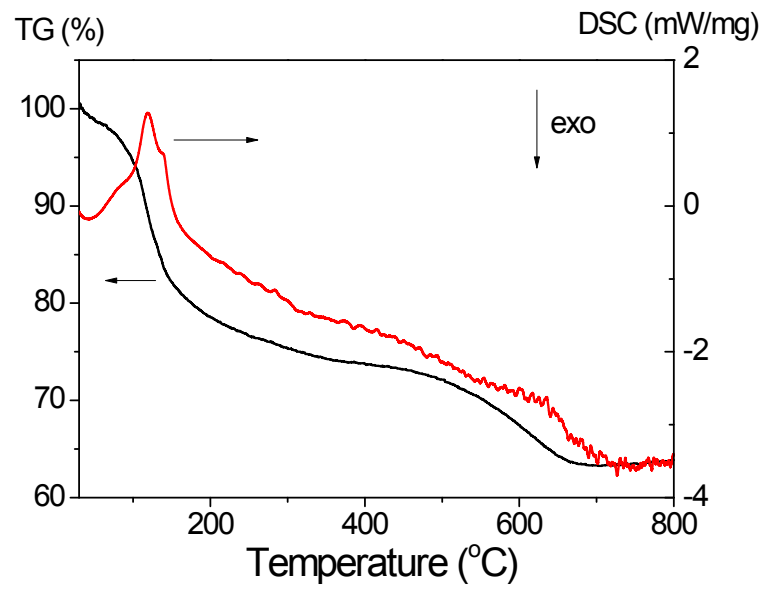

**Figure S3.** TG and DSC curves of as-anodized PNC.

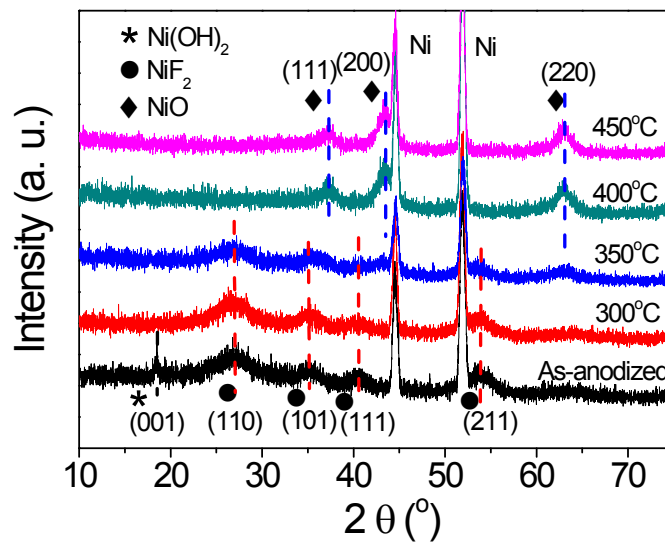

**Figure S4.** XRD result of as-anodized PNC and the samples after air annealing at different temperatures for 1 hour.

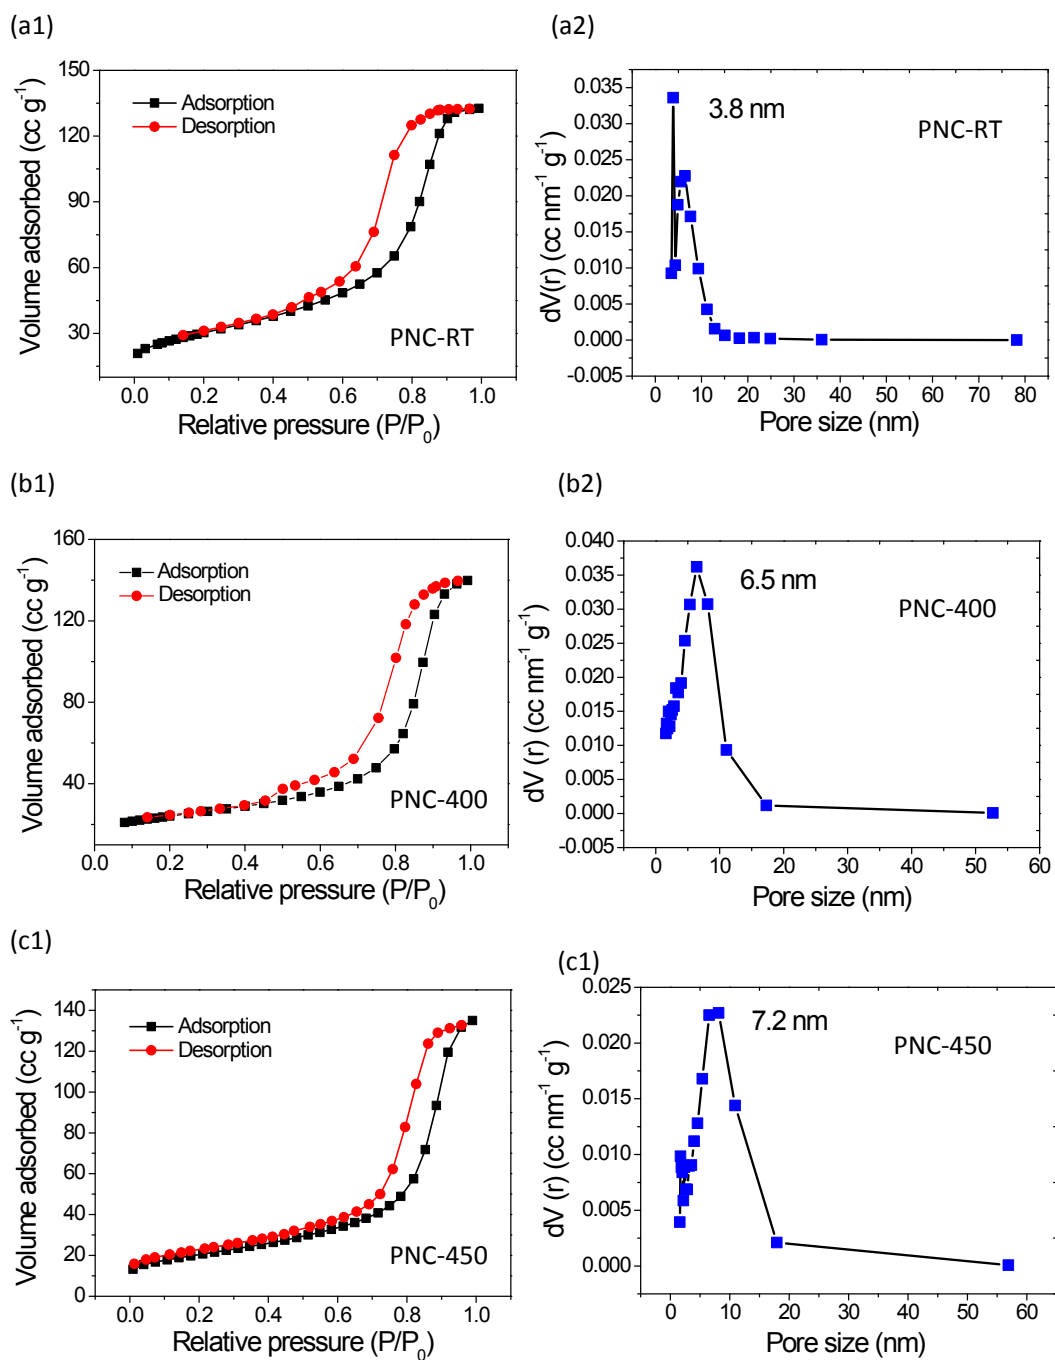

**Figure S5.** BET isotherm (a1, a2 and a3) and BJH pore size distribution (a2, b2 and b3) of anodic samples.

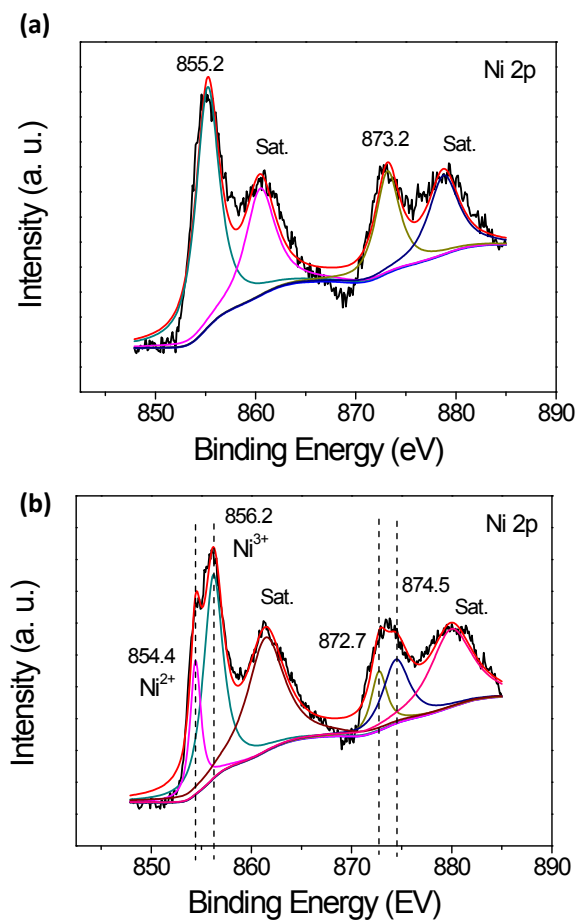

**Figure S6.** Ni 2p XPS (X-ray photoelectron spectroscopy) of PNC-400 (a) and PNC-600.

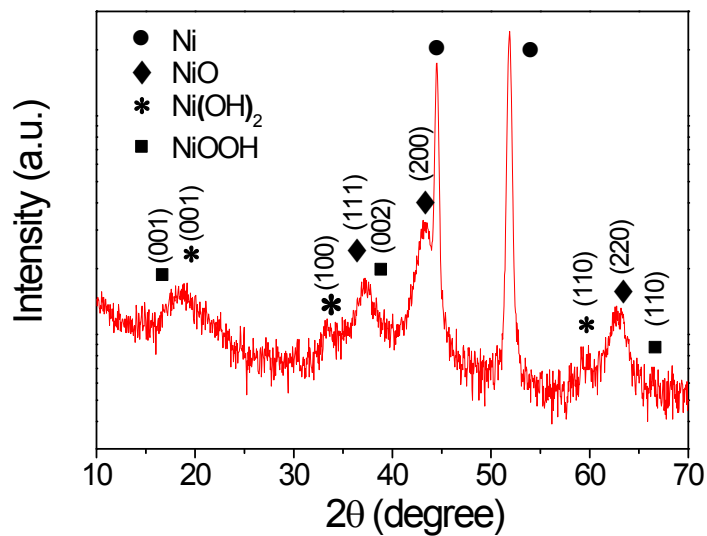

**Figure S7.** XRD of PNC-600 after 200 CV cycles.

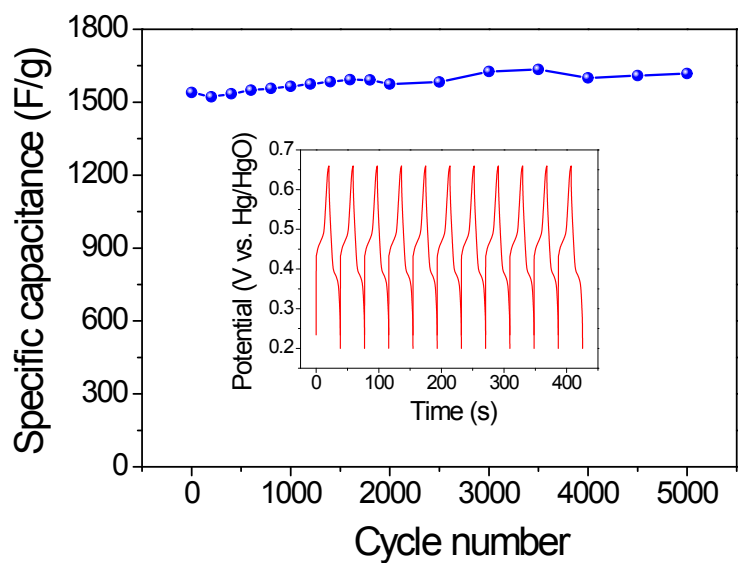

**Figure S8.** Galvanostatic charge/discharge (GCD) measurement of PNC-600 at 40 A g<sup>-1</sup>. Inset: typical GCD curves during the test.

**Table S2.** Impedance components determined by fitting EIS experimental data using the equivalent circuit as shown in Figure 5d.

| Material | R <sub>s</sub><br>(ohm) | CPE-T<br>(F) | CPE-P   | R <sub>ct</sub><br>(ohm) | W1-R<br>(ohm) | W1-T    | W1-P    |
|----------|-------------------------|--------------|---------|--------------------------|---------------|---------|---------|
| PNC-400  | 1.532                   | 0.0085598    | 0.68645 | 6.36                     | 3.888         | 0.83954 | 0.44073 |
| PNC-600  | 1.488                   | 0.011587     | 0.68382 | 3.547                    | 0.93687       | 0.22972 | 0.45427 |
